# Supplementary material
Source: PubMed Central journal article supplement (PMC7288350)
Supplement: NIHMS1592694-supplement-Glossary.pdf [file NIHMS1592694-supplement-Glossary.pdf]

**Glossary:**

**Ultradian**

Ultradian rhythm is a recurrent cycle with a period shorter than 24h.
